# Supplementary material for: Development of a Novel Pre-Vascularized Three-Dimensional Skin Substitute Using Blood Plasma Gel
Source: PubMed Central journal article supplement — Cell Transplant. 2018 Sep 11;27(10):1535–47. doi: 10.1177/0963689718797570 (PMC6180730; doi:10.1177/0963689718797570), 2018-09-11
Supplement: Supplement_S1_The_immunofluorescent_staining_of_EPCs_of_CD31.pdf [file Supplement_S1_The_immunofluorescent_staining_of_EPCs_of_CD31.pdf]

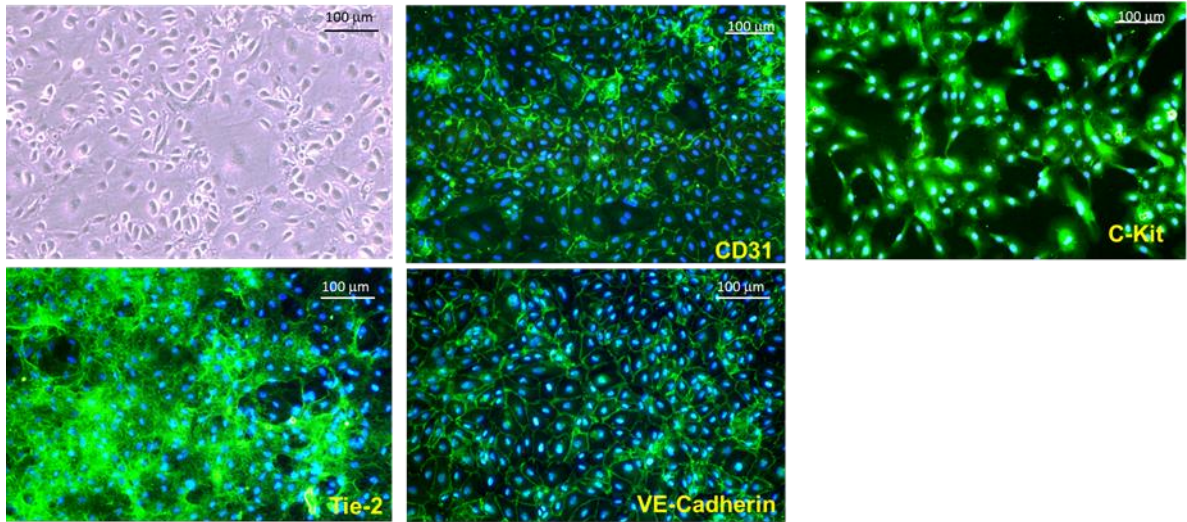

**Supplement S1** The immunofluorescent staining of EPCs of CD31, c-Kit, Tie-2, and VE-Cadherin markers, respectively.
